# Supplementary material
Source: PubMed Central journal article supplement (PMC4181598)
Supplement: NIHMS631325-supplement-Supplemental_material.pdf [file NIHMS631325-supplement-Supplemental_material.pdf]

## Supplemental Material

### Supplemental Figure

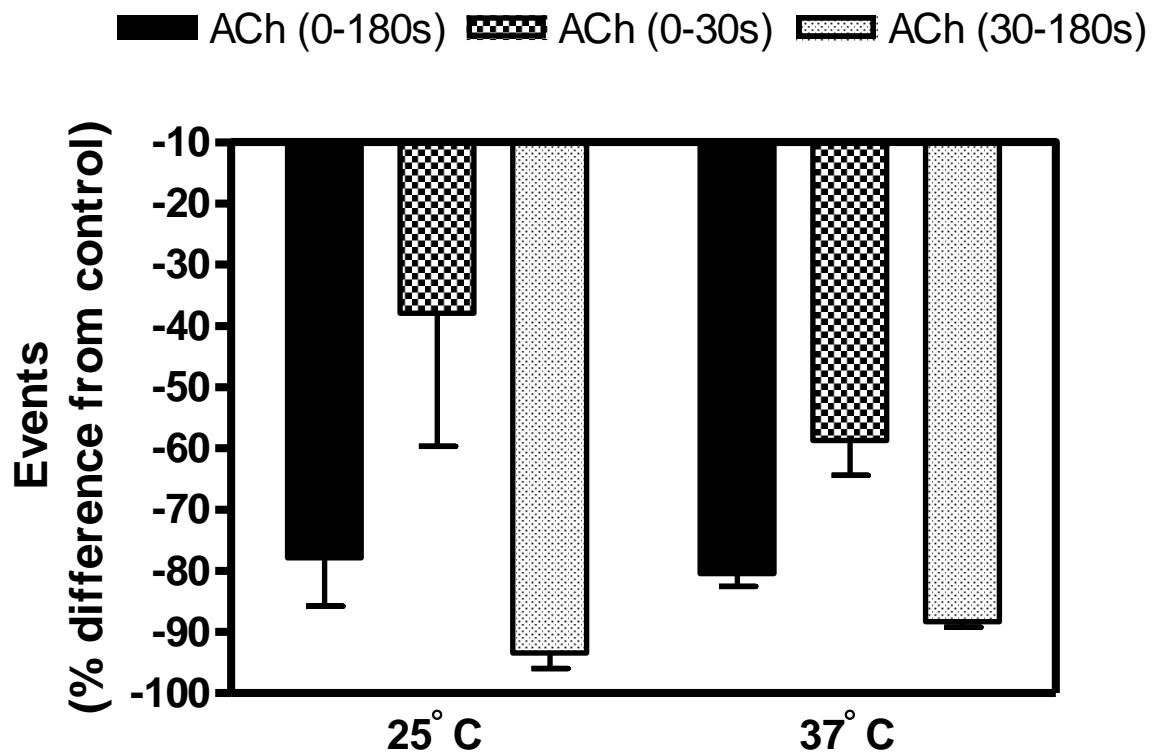

**Supplemental Figure I.** Net effect of combined TRPV4 and IK1/SK3 inhibition on ACh-induced  $\text{Ca}^{2+}$  dynamics at 25°C and 37°C. Arteries from wild-type mice were treated with the combination of HC-067047 (1  $\mu\text{M}$ ), charbdotoxin (0.1  $\mu\text{M}$ ) and apamin (0.5  $\mu\text{M}$ ) and stimulated with 2  $\mu\text{M}$  ACh (n=5). There was no statistical difference between same-phase groups at 25°C and 37°C.
